# Supplementary material
Source: Research Square preprint supplement (doi:10.21203/rs.3.rs-10347562/v1)
Supplement: Supplementary file 1 [file 3839500eb710b4bb4dfe79a9.docx]

**SUPPLEMENTARY TABLES**

**Supplementary Table S1**. Radiological and pathological characteristics of MRI-visible lesions. ciPCa, clinically insignificant prostate cancer; csPCa, clinically significant prostate cancer.

| **Number of lesions, *n* (*%*)** |  |
| --- | --- |
| Total | 113 (100%) |
| csPCa | 66 (58.41%) |
| ciPCa | 19 (16.81%) |
| No cancer | 28 (24.78%) |
| **PI-RADS score, *n* (%)** |  |
| PI-RADS 3 | 18 (15.93%) |
| PI-RADS 4 | 59 (52.21%) |
| PI-RADS 5 | 36 (31.86%) |
| **Lesion location, *n* (%)** |  |
| Peripheral | 85 (75.22%) |
| Transitional and Central | 28 (24.78%) |
| **Sector, *n* (%)** |  |
| Apex lateral | 16 (14.16%) |
| Apex medial | 15 (13.27%) |
| Base lateral | 10 (8.85%) |
| Base medial | 14 (12.39%) |
| Mid lateral | 44 (38.94%) |
| Mid medial | 14 (12.39%) |

**Supplementary Table S2.** Causes of false positive and false negative findings for clinically significant prostate cancer (Gleason ≥ 7) using the Moderate-or-High threshold. AI, artificial intelligence computer-aided detection.

|  |  | **%** | **AI-CAD score** | **Causes** | ***n*** |
| --- | --- | --- | --- | --- | --- |
| **Moderate and High marker** | **False positive** | 23.89 | High | Adenoma | 2 |
| Gleason 3 + 3 | 16 |
| Granulomatous prostatitis | 1 |
| Normal gland | 3 |
| Other | 1 |
| Prostatitis | 4 |
| 4.42 | Moderate | Adenoma | 1 |
| Hyperplasia | 1 |
| Normal gland | 2 |
| Prostatitis | 1 |
| **False negative** | 4.42 | No | Gleason 3 + 4 | 4 |
| Gleason 4 + 3 | 1 |
| **High marker** | **False positive** | 23.89 | High | Adenoma | 2 |
| Gleason 3 + 3 | 16 |
| Granulomatous prostatitis | 1 |
| Normal gland | 3 |
| Other | 1 |
| Prostatitis | 4 |
| **False negative** | 7.96 | Moderate | Gleason 3 + 4 | 5 |
| Gleason 4 + 3 | 1 |
| Gleason 4 + 4 | 2 |
| Gleason 4 + 5 | 1 |
| 4.42 | No | Gleason 3 + 4 | 4 |
| Gleason 4 + 3 | 1 |

**Supplementary Table S3**. Diagnostic performance of the AI-CAD system for clinically significant prostate cancer (Gleason ≥ 7) according to lesion location and threshold definition. All metrics are reported with 95% confidence intervals. AI, artificial intelligence computer-aided detection; NPV, negative predictive value; PPV, positive predictive value; PZ, peripheral zone; TZ + CZ, transitional + central zone.

| **Prostate region** | **Threshold** | **Sensitivity** | **Specificity** | **PPV** | **NPV** | **Accuracy** |
| --- | --- | --- | --- | --- | --- | --- |
| **PZ** | Moderate and High marker | 0.95  (0.85, 0.98) | 0.31  (0.17, 0.49) | 0.73  (0.61, 0.82) | 0.75  (0.47, 0.91) | 0.73  (0.63, 0.81) |
| High-marker | 0.80  (0.68, 0.89) | 0.45  (0.28, 0.62) | 0.74  (0.62, 0.83) | 0.54  (0.35, 0.72) | 0.68  (0.58, 0.77) |
| **TZ + CZ** | Moderate and High marker | 0.80  (0.49, 0.94) | 0.33  (0.16, 0.56) | 0.40  (0.22, 0.61) | 0.75  (0.41, 0.93) | 0.50  (0.33, 0.67) |
| High-marker | 0.70  (0.40, 0.89) | 0.39  (0.20, 0.61) | 0.39  (0.20, 0.61) | 0.70  (0.40,0.89) | 0.50  (0.33, 0.67) |

**Supplementary Table S4.** Zonal distribution of false positive and false negative findings for clinically significant prostate cancer (Gleason ≥ 7) according to Moderate-or-High and High-risk thresholds. PZ, peripheral zone; TZ + CZ, transitional + central zone. AI, artificial intelligence computer-aided detection.

| **Threshold** |  | **%** | **AI-CAD score** | **Anatomical distributions** | ***N*** | **Misclassification rate (%) with absolute numbers**  **(*n*/ *N*)** |
| --- | --- | --- | --- | --- | --- | --- |
| **Moderate and High marker** | False positive | 23.89 | High | TZ + CZ | 11 | 39.39 (11/28) |
| PZ | 16 | 18.81 (16/85) |
| 4.42 | Moderate | TZ + CZ | 1 | 3.57 (1/28) |
| PZ | 4 | 4.71 (4/85) |
| False negative | 4.42 | No | TZ + CZ | 2 | 7.14 (2/28) |
| PZ | 3 | 3.53 (3/85) |
| **High marker** | False positive | 23.89 | High | TZ + CZ | 11 | 39.39 (11/28) |
| PZ | 16 | 18.81 (16/85) |
| 7.96 | Moderate | TZ + CZ | 1 | 3.57 (1/28) |
| PZ | 8 | 18.82 (8/85) |
| False negative | 4.42 | No | TZ + CZ | 2 | 7.14 (2/28) |
| PZ | 3 | 3.53 (3/85) |

**Supplementary Table S5.** Zonal distribution and causes of false negative findings for overall prostate cancer (Gleason ≥ 6), considering Moderate-or-High and High-risk thresholds. All metrics are reported with 95% confidence intervals. PZ, peripheral zone; TZ + CZ, transitional + central zone.

| **Prostate region** | **Threshold** | **Sensitivity** | **Specificity** | **PPV** | **NPV** | **Accuracy** |
| --- | --- | --- | --- | --- | --- | --- |
| **PZ** | Moderate and High marker | 0.94  (0.86, 0.98) | 0.44  (0.24, 0.66) | 0.86  (0.77, 0.92) | 0.67  (0.39, 0.86) | 0.84  (0.74, 0.90) |
| High-marker | 0.82  (0.71, 0.89) | 0.67  (0.44, 0.84) | 0.90  (0.80, 0.95) | 0.50  (0.31, 0.69) | 0.79  (0.69, 0.86) |
| **TZ + CZ** | Moderate and High marker | 0.78  (0.55, 0.91) | 0.40  (0.17, 0.69) | 0.70  (0.48, 0.85) | 0.50  (0.22, 0.78) | 0.64  (0.46, 0.79) |
| High-marker | 0.72  (0.49, 0.88) | 0.50  (0.24, 0.76) | 0.72  (0.49, 0.88) | 0.50  (0.24, 0.76) | 0.64  (0.46, 0.79) |

**Supplementary Table S6.** Detailed imaging features, anatomical distribution, and histopathological outcomes of lesions classified as PI-RADS 3 included in the exploratory analysis. ciPCa, clinically insignificant prostate cancer; csPCa, clinically significant prostate cancer.

| **Number of lesions, *n* (*%*)** |  |
| --- | --- |
| csPCa | 3 |
| ciPCa | 2 |
| No cancer | 13 |
| Total | 18 |

**Supplementary Table S7.** Overall diagnostic performance of the CAD system for PI-RADS 3 lesions, evaluated separately for clinically significant (Gleason ≥ 7) prostate cancer and overall prostate cancer (clinically significant + clinically insignificant; Gleason ≥ 6), using two positivity thresholds (Moderate-or-High and High-only). All metrics are reported with 95% confidence intervals. ciPCa, clinically insignificant prostate cancer; csPCa, clinically significant prostate cancer. NPV, negative predictive value; PCa, prostate cancer; PPV, positive predictive value.

|  | **Threshold** | **Sensitivity** | **Specificity** | **PPV** | **NPV** | **Accuracy** |
| --- | --- | --- | --- | --- | --- | --- |
| csPCa | Moderate and High marker | 0.33  (0.06, 0.79) | 0.60  (0.36, 0.80) | 0.14  (0.03, 0.51) | 0.82  (0.52, 0.94) | 0.56  (0.34, 0.75) |
| High-marker | 0.33  (0.06, 0.79) | 0.67  (0.42, 0.84) | 0.17  (0.03, 0.56) | 0.83  (0.55, 0.95) | 0.61  (0.39, 0.80) |
| PCa | Moderate and High marker | 0.20  (0.04, 0.62) | 0.54  (0.29, 0.77) | 0.14  (0.03, 0.51) | 0.63  (0.35, 0.85) | 0.44  (0.25, 0.66) |
| High-marker | 0.20  (0.04, 0.62) | 0.62  (0.35, 0.83) | 0.17  (0.03, 0.56) | 0.67  (0.39, 0.86) | 0.50  (0.29, 0.71) |

**Supplementary Table S8.** Diagnostic performance of the CAD system for PI-RADS 3 lesions stratified by lesion location (PZ vs TZ + CZ), reported separately for clinically significant (Gleason ≥ 7) and overall prostate cancer (clinically significant + clinically insignificant; Gleason ≥ 6), using the Moderate-or-High positivity threshold. All metrics are reported with 95% confidence intervals. csPCa, clinically significant prostate cancer; NPV, negative predictive value; PCa, prostate cancer; PPV, positive predictive value; PZ, peripheral zone; TZ + CZ, transitional + central zone.

| **Type of disease** | **Prostate region** | **Threshold** | **Sensitivity** | **Specificity** | **PPV** | **NPV** | **Accuracy** |
| --- | --- | --- | --- | --- | --- | --- | --- |
| **csPCa** | PZ | Moderate and High marker | 0.50  (0.09, 0.91) | 0.67  (0.30, 0.90) | 0.33  (0.06, 0.79) | 0.80  (0.38, 0.96) | 0.63  (0.31, 0.86) |
| TZ + CZ | Moderate and High marker | 0.00  (0.00, 0.79) | 0.56  (0.27, 0.81) | 0.00  (0.00, 0.49) | 0.83  (0.44, 0.97) | 50.00  (0.24, 0.76) |
| **PCa** | PZ | Moderate and High marker | 0.33  (0.06, 0.79) | 0.60  (0.23, 0.88) | 0.33  (0.06, 0.79) | 0.60  (0.23, 0.88) | 50.00  (0.22, 0.78) |
| TZ + CZ | Moderate and High marker | 0.00  (0.00, 0.66) | 0.50  (0.21, 0.78) | 0.00  (0.00, 0.49) | 0.67  (0.29, 0.90) | 40.00  (0.17, 0.69) |
