# Supplementary material
Source: Research Square preprint supplement (doi:10.21203/rs.3.rs-10347562/v1)
Supplement: Supplementary file 2 [file d11d9457eb21cecddd79b6d1.docx]

**SUPPLEMENTARY METHODS**

**Study design**

This retrospective, real-world, single-centre validation study was performed at Clínica Girona (Girona, Spain). All imaging, biopsy and histopathological procedures followed standard clinical workflows and were not modified for research purposes. The study assessed the lesion-level performance of an AI-based CAD system using bpMRI sequences (T2-weighted and DWI) derived from routine clinical prostate mpMRI examinations, with MRI-targeted biopsy histopathology as the reference standard.

This study was conducted in compliance with applicable ethical and data protection regulations. Due to the retrospective nature of the analysis and the use of anonymized clinical data, the requirement for written informed consent was waived according to institutional policy.

**Patient cohort**

In this study, patient selection reflected routine clinical practice for in-bore MRI-guided robotic prostate biopsy at Clínica Girona. In this setting, biopsy targeting is focused on a single index lesion, defined as the lesion with the highest level of suspicion (PI-RADS ≥3) on mpMRI.

Although the robotic system allows sampling of more than one lesion (typically up to 2–3), standard clinical practice prioritizes biopsy of the index lesion only. This approach is driven by procedural considerations and the objective of maximizing diagnostic yield while maintaining procedural efficiency. Consequently, patients included in this study presented with a single MRI-visible lesion classified as PI-RADS ≥3 that was selected for biopsy.

In cases where additional lesions were present, these were typically classified as PI-RADS <3 and were not targeted for biopsy. Therefore, the study design does not reflect an arbitrary restriction to single-lesion cases, but rather the standard clinical workflow used for MRI-guided in-bore biopsy in routine practice.

Histopathological outcomes were derived from targeted biopsies of the index lesion, and these results were used as the reference standard for correlation with both radiological assessment and AI-CAD (QP-Prostate®) outputs.

**MRI acquisition**

DCE imaging was obtained using a T1-weighted gradient-echo sequence with high spatial resolution (TR 4.69 ms, TE 1.6 ms, flip angle 12°, isotropic voxel size 1.6 mm, field of view 100 mm). A total of 50 temporal phases were acquired with a temporal resolution of 3 s, resulting in an overall acquisition time of approximately 2.5 minutes, including preparation pulses. A gadolinium-based contrast agent (Gd-DTPA) was administered intravenously at a dose of 2 mL/kg.

DWI sequences were acquired using an echo-planar imaging sequence (TR [4788 – 10867] ms, TE [72.1 – 74.1] ms), with an in-plane resolution between 0.6 and 1.0 mm, slice thickness between 3 and 4 mm, and b-values of 50 and 1000 s/mm².

T2-weighted sequences (TR [5000 – 14636] ms, TE [146.53 – 173.06] ms) were acquired with an isotropic voxel size between 0.18 and 0.35 mm, and a slice thickness of 3 mm.

All MRI datasets were transferred in DICOM format from the institutional PACS using a secure imaging connector, enabling centralized storage and analysis. Prior to further processing, all examinations underwent a standardized quality control procedure to ensure suitability for analysis. Quality control included verification of the presence and completeness of the required sequences, adequate contrast-to-noise characteristics, full prostate coverage within the field of view, and absence of significant artifacts that could interfere with image interpretation.

**Biopsy procedure and reference standard**

Biopsy procedures were performed using an in-bore MRI-targeted robotic system (Soteria Medical BV, Arnhem, the Netherlands). In routine clinical practice at this institution, biopsy targeting is limited to the radiologist-defined index lesion, corresponding to the lesion of highest suspicion on MRI (PI-RADS ≥3).

Although the robotic system allows sampling of multiple lesions (typically up to 2–3), standard clinical workflow prioritizes biopsy of a single index lesion. Accordingly, when additional lesions were present, these were classified as PI-RADS <3 and were not routinely sampled.

AI-CAD outputs were not available at the time of biopsy decision-making, and lesion targeting was based exclusively on the radiologist’s assessment. Therefore, lesions identified as suspicious only by AI-CAD during retrospective analysis were not biopsied.

As a result, the study cohort consists of patients with a single PI-RADS ≥3 index lesion, reflecting routine clinical practice rather than a study-specific selection criterion.

Histopathological evaluation of biopsy specimens was performed by experienced genitourinary pathologists according to standard diagnostic criteria. Clinically significant prostate cancer (csPCa) was defined as ISUP grade ≥2 (Gleason score ≥3+4), whereas ISUP grade 1 (Gleason score 3+3) was considered clinically insignificant, and remaining findings were classified as benign.

**AI-CAD system features and study-specific implementation**

QP-Prostate® processes prostate MRI examinations using standard DICOM inputs and operates without user interaction or manual parameter adjustment. In the present study, the software analysed bpMRI data, including T2-weighted and DWI sequences.Based on quantitative image-derived information, the AI-CAD generated lesion-level outputs consisting of spatial overlays highlighting regions of interest within the prostate gland together with a categorical risk assignment. All outputs were generated automatically and exported in standard DICOM format for retrospective analysis. The software was applied retrospectively to all MRI examinations included in the study, and its outputs were generated independently of radiological interpretation and were not available to radiologists at the time of MRI reading or biopsy decision-making. For performance evaluation, only the AI-CAD output corresponding to the radiologist-identified index lesion targeted for biopsy was considered. No modification of the software configuration, thresholds, or operating parameters was performed beyond the default settings of the device. QP-Prostate® v.2 was used for the present study.

**Statistical analysis**

Given the retrospective observational design, no formal sample size calculation was performed. Sample size was determined by all eligible consecutive patients meeting study inclusion criteria during the predefined study period

Descriptive statistics were used to summarize patient and lesion characteristics. Continuous variables are reported as mean ± standard deviation (SD) and median (range), as appropriate. Categorical variables are reported as absolute and relative frequencies.

The diagnostic performance of the AI-CAD was evaluated according to the predefined primary and secondary study objectives, applying two operating thresholds to dichotomize its output (Moderate-or-High as positive and High-risk only as positive).

For each combination of reference standard and threshold configuration, lesion-level diagnostic performance metrics were calculated, including sensitivity, specificity, positive predictive value (PPV), negative predictive value (NPV), and overall accuracy. All metrics are reported with 95% confidence intervals, computed using the Wilson score method.

All included cases generated valid AI-CAD outputs and conclusive histopathological reference standard assessments. No indeterminate results or missing data were observed for index test or reference standard analyses.

Additional exploratory analyses were performed for the primary endpoint (csPCa) to investigate potential factors associated with false-positive and false-negative AI-CAD results. Discordant cases were reviewed in conjunction with the corresponding radiologist’s comments. Lesion anatomical location was analyzed by prostate zone (PZ vs TZ + CZ), separately for each threshold configuration.

A dedicated subgroup analysis (exploratory endpoint) was conducted for lesions classified as PI-RADS 3. In this subgroup, biopsy results were used to determine whether lesions corresponded to csPCa, clinically insignificant (ci)PCa, or benign findings. Diagnostic performance in PI-RADS 3 lesions was further evaluated according to lesion location, considering the Moderate-or-High threshold configuration.

Additionally, the potential clinical impact of the AI-CAD was explored by estimating how many biopsies might have been avoided and how many csPCa cases might have been missed if biopsy decisions had been guided by AI-CAD classifications under the two evaluated thresholds (Moderate + High and High-only). Lesions classified by the system as negative for csPCa were considered as potentially avoided biopsies. Missed csPCa corresponded to cases with csPCa at histopathology that were classified as negative for csPCa by the system. The analysis was performed in the full dataset and separately in the subset of PI-RADS 3 lesions.
